# Supplementary material for: Sugarcane Cultivation and its Impacts on Biophysical Environment and Livelihoods in Mumias Sugar Belt, Kakamega County, Kenya
Source: Research Square preprint supplement (doi:10.21203/rs.3.rs-8055324/v1), 2025-11-22
Supplement: Supplementary file 1 [file ff8ed3a117890d277277916d.docx]

Accuracy level for 2021- 2016 Maps

| 2021 map | | | | | | | | | | | | | | |
| --- | --- | --- | --- | --- | --- | --- | --- | --- | --- | --- | --- | --- | --- | --- |
| Land Cover Change Type | Sugarcane | | Annual Cropland | | Forestland | | Grassland | | Wetland | | Other land | | Totals | |
| Sugarcane | 170 | | 0 | | 0 | | 9 | | 0 | | 2 | | 181 | |
| Annual Cropland | 1 | | 13 | | 0 | | 0 | | 0 | | 0 | | 14 | |
| Forestland | 3 | | 0 | | 26 | | 2 | | 0 | | 0 | | 31 | |
| Grassland | 9 | | 0 | | 5 | | 41 | | 0 | | 2 | | 57 | |
| Wetland | 0 | | 0 | | 0 | | 0 | | 1 | | 0 | | 1 | |
| Other land | 2 | | 0 | | 0 | | 0 | | 0 | | 14 | | 16 | |
| **Totals** | **185** | | **13** | | **31** | | **52** | | **1** | | **18** | | **300** | |
| 2018 map | | | | | | | | | | | | | | |
| Land Cover Change Type | | Sugarcane | | Annual Cropland | | Forestland | | Grassland | | Wetland | | Other land | | Totals |
| Sugarcane | | 160 | | 0 | | 0 | | 0 | | 1 | | 13 | | 174 |
| Annual Cropland | | 8 | | 8 | | 0 | | 0 | | 0 | | 1 | | 17 |
| Forestland | | 13 | | 0 | | 22 | | 0 | | 0 | | 1 | | 36 |
| Grassland | | 13 | | 0 | | 2 | | 48 | | 0 | | 3 | | 66 |
| Wetland | | 0 | | 0 | | 0 | | 0 | | 1 | | 0 | | 1 |
| Other land | | 0 | | 0 | | 0 | | 0 | | 0 | | 6 | | 7 |
| **Totals** | | **194** | | **8** | | **24** | | **48** | | **2** | | **24** | | **300** |
| 2016 map | | | | | | | | | | | | | | |
| Land Cover Change Type | Sugarcane | | Annual Cropland | | Forestland | | Grassland | | Wetland | | Other land | | Totals | |
| Sugarcane | 170 | | 1 | | 0 | | 3 | | 0 | | 0 | | 174 | |
| Annual Cropland | 21 | | 15 | | 0 | | 1 | | 0 | | 1 | | 38 | |
| Forestland | 3 | | 0 | | 12 | | 1 | | 0 | | 0 | | 16 | |
| Grassland | 12 | | 0 | | 1 | | 53 | | 0 | | 0 | | 66 | |
| Wetland | 0 | | 0 | | 0 | | 0 | | 2 | | 0 | | 2 | |
| Other land | 1 | | 0 | | 0 | | 1 | | 0 | | 2 | | 4 | |
| Totals | 207 | | 16 | | 13 | | 59 | | 2 | | 3 | | 300 | |
